# Supplementary material for: Radiomics Signatures of Carotid Plaque on Computed Tomography Angiography
Source: Springer Nature journal article supplement (doi:10.1007/s00062-023-01289-9), 2023-05-17
Supplement: MOESM1 [file 25372908]

## Supplementary Material

**Article title:**

Radiomics signatures of carotid plaque on computed tomography angiography: an approach to identify symptomatic plaques

**Journal name:**

*Clinical Neuroradiology*

**Author names:**

Jinglong Shi, Yu Sun, Jie Hou, Xiaogang Li, Jitao Fan, Libo Zhang, Rongrong Zhang, Hongrui You, Zhenguo Wang, Anxiaonan Zhang, Jianhua Zhang, Qiuyue Jin, Lianlian Zhao, Benqiang Yang

**Corresponding author:** Benqiang Yang

**Affiliation:**

Department of Radiology, General Hospital of Northern Theater Command, Shenyang, China  
Key Laboratory of Cardiovascular Imaging and Research, Liaoning Province, China

**E-mail:** bqyang888@sina.com

**Table S1 Reproducibility of conventional features.**

| Conventional features  | Intra-observer | Inter-observer |
|------------------------|----------------|----------------|
| CCTI                   | 0.962          | 0.956          |
| ICTI                   | 0.960          | 0.932          |
| Degree of stenosis     | 0.992          | 0.980          |
| Total plaque thickness | 0.997          | 0.990          |
| Soft plaque thickness  | 0.998          | 0.994          |
| Carotid plaque length  | 0.997          | 0.963          |
| Plaque ulceration      | 1*             | 1*             |
| Carotid rim sign       | 0.902*         | 0.815*         |
| PR                     | 0.933*         | 0.791*         |

Intra-class correlation coefficient (ICC) and Cohen's kappa coefficient were calculated for the intra- and inter-observer consistency. The intra- and inter-observer reproducibility of conventional features were substantial and excellent. *CCTI* common carotid tortuosity index, *ICTI* internal carotid tortuosity index, *PR* positive remodeling

\* Indicated Cohen's kappa coefficient

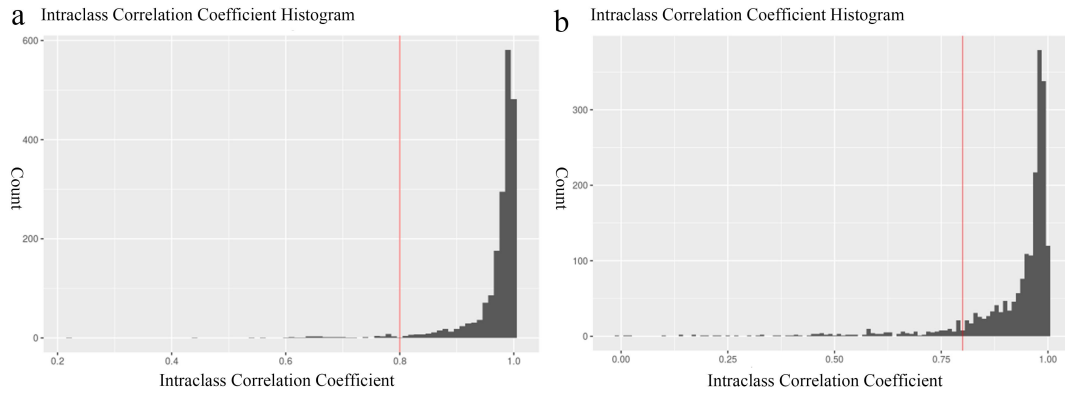

**Fig. S1** Reproducibility of radiomics features.

Radiomics features with  $ICC \leq 0.8$  were removed by intra-observer (a, 49 features) and inter-observer (b, 182 features) agreement, and the remaining 1916 features were included in the analysis.
